# Supplementary material for: Water quality during extended stagnation and flushing in a college residential hall
Source: Royal Society of Chemistry journal article supplement (doi:10.1039/d3ew00038a), 2023-01-01
Supplement: d3ew00038a1.pdf [file d3ew00038a1.pdf]

## Supplementary Material

### Water Quality During Extended Stagnation and Flushing in a College Residential Hall

Danielle M. Angert,<sup>a</sup> Christian Ley,<sup>a</sup> Kyungyeon Ra,<sup>b</sup> Yoorae Noh,<sup>b</sup> Nadezhda Zyaykina,<sup>a,b</sup>

Elizabeth Montagnino,<sup>b</sup> Ruth Wei,<sup>c</sup> Andrew J. Whelton,<sup>a,b</sup> Caitlin R. Proctor<sup>a,d\*</sup>

<sup>a</sup> Division of Ecological and Environmental Engineering, Purdue University, West Lafayette, IN, USA

<sup>b</sup> Lyles School of Civil Engineering, Purdue University, West Lafayette, IN, USA

<sup>c</sup> Department of Biological Sciences, Purdue University, West Lafayette, IN, USA

<sup>d</sup> Department of Agricultural and Biological Engineering, Purdue University, West Lafayette, IN, USA

\*Address correspondence to Caitlin R. Proctor, Ag. & Biological Engineering, 225 S. University Street, Purdue University, 550 Stadium Mall Drive, West Lafayette, IN USA 47907. Phone: 765-496-1002. Email: [proctoc@purdue.edu](mailto:proctoc@purdue.edu)

**Table S1:** Limit of Detection (LOD) and Limit of Quantification (LOQ) for the elemental analysis as measured by ICP-OES.

| <i>Element</i>   | <i>LOQ</i> | <i>LOD</i> |
|------------------|------------|------------|
| <i>Aluminum</i>  | 0.86       | 0.26       |
| <i>Arsenic</i>   | 4.95       | 1.49       |
| <i>Beryllium</i> | 0.51       | 0.15       |
| <i>Cadmium</i>   | 0.35       | 0.10       |
| <i>Cobalt</i>    | 1.13       | 0.91       |
| <i>Chromium</i>  | 3.02       | 0.91       |
| <i>Copper</i>    | 2.78       | 0.83       |
| <i>Iron</i>      | 3.15       | 0.95       |
| <i>Mercury</i>   | 1.17       | 0.35       |
| <i>Manganese</i> | 0.52       | 0.16       |
| <i>Nickel</i>    | 0.74       | 0.52       |
| <i>Lead</i>      | 1.91       | 0.57       |
| <i>Selenium</i>  | 3.87       | 1.16       |
| <i>Zinc</i>      | 0.75       | 0.23       |

**Table S2:** Total chlorine residual (mg/L as Cl<sub>2</sub>). ND = below the limit of detection for the HACH® Pocket Colorimeter, 0.02 mg/L as Cl<sub>2</sub>

| Trip #                             | 1    | 2  | 3  | 4**  | 5**<br>(pre-flush) | 5** (post-flush) | 6**  | 7     |
|------------------------------------|------|----|----|------|--------------------|------------------|------|-------|
| Location                           |      |    |    |      |                    |                  |      |       |
| 1: basement bathroom               | 0.02 | ND | ND | 0.06 | 0.03               | 0.04             | ND   | 0.03  |
| 2: kitchen                         | ND   | ND | ND | ND   | 0.09               | 0.46*            | ND   | 0.31* |
| 3: 2 <sup>nd</sup> floor sink      | ND   | ND | ND | ND   | 0.07               | 0.46*            | ND   | 0.02  |
| 4: 2 <sup>nd</sup> floor sink      | ND   | ND | ND | ND   | 0.05               | 0.04             | ND   | 0.04  |
| 5: 2 <sup>nd</sup> floor sink      | ND   | ND | ND | ND   | 0.04               | 0.33*            | ND   | 0.04  |
| 6: 2 <sup>nd</sup> floor sink      | ND   | ND | ND | ND   | 0.08               | 0.07             | ND   | 0.08  |
| 7: shower                          | ND   | ND | ND | ND   | 0.03               | 0.03             | 0.05 | 0.02  |
| 8: shower                          | 0.02 | ND | ND | ND   | ND                 | 0.03             | ND   | 0.02  |
| 9: 3 <sup>rd</sup> floor bathroom  | ND   | ND | ND | ND   | ND                 | 0.37*            | ND   | 0.65* |
| 10: 3 <sup>rd</sup> floor bathroom | 0.02 | ND | ND | ND   | 0.02               | 0.12             | ND   | 0.06  |

\*Concentration exceeded the legally undetectable total chlorine limit of 0.2 mg/L

\*\*Plastic vials instead of glass were used with the low-range chlorine kit for trips 4-6

**Table S3:** Average outdoor and first-draw water temperatures on sampling dates

| <i>Trip #</i> | <i>Average outdoor temperature(°C) <sup>46</sup></i> | <i>Average hot water temperature (°C)</i> | <i>Average cold water temperature (°C)</i> |
|---------------|------------------------------------------------------|-------------------------------------------|--------------------------------------------|
| 1             | 2.22                                                 | 19.28                                     | 19.55                                      |
| 2             | 12.78                                                | 19.33                                     | 19.25                                      |
| 3             | 23.89                                                | 29.00                                     | 28.68                                      |
| 4             | 27.78                                                | 31.18                                     | 30.88                                      |
| 5             | 18.30                                                | 25.42*                                    | 25.43*                                     |
| 6             | 23.33                                                | 26.98                                     | 26.85                                      |
| 7             | 22.22                                                | 27.0                                      | 26.65                                      |

\*Water temperature was measured for the first-draw samples during Trip 5, before full-building flushing was performed.

**Table S4:** Ion concentrations before and after flushing. ND = not detected. Ions were additionally analyzed at two locations during 5 of the 7 sampling events (data not shown). One interesting observation within this limited data set was the increase in concentrations of  $\text{SO}_4^{2-}$  and  $\text{NO}_3^-$  after flushing in both hot and cold water. Several of these ions have implied roles in ecology, but health impacts are minimal, and observed levels were not health-relevant.

Anion concentrations (ppm)

| <i>Sample</i>  | <i>F<sup>-</sup></i> | <i>Cl<sup>-</sup></i> | <i>NO<sub>2</sub>-N</i> | <i>Br</i> | <i>NO<sub>3</sub><sup>-</sup></i> | <i>PO<sub>4</sub><sup>3-</sup></i> | <i>SO<sub>4</sub><sup>2-</sup></i> |
|----------------|----------------------|-----------------------|-------------------------|-----------|-----------------------------------|------------------------------------|------------------------------------|
| Hot, stagnant  | ND                   | 44.31                 | ND                      | 0.47      | 0.68                              | 0.29                               | 49.93                              |
| Hot, flushed   | ND                   | 54.77                 | ND                      | 0.36      | 4.42                              | 0.24                               | 56.31                              |
| Cold, stagnant | ND                   | 40.96                 | ND                      | 0.30      | 1.51                              | 0.60                               | 48.58                              |
| Cold, flushed  | ND                   | 61.11                 | ND                      | 0.33      | 3.81                              | 0.59                               | 64.54                              |

Cation concentrations (ppm)

| <i>Sample</i>  | <i>Li<sup>+</sup></i> | <i>Na<sup>+</sup></i> | <i>NH<sub>3</sub>-N</i> | <i>K<sup>+</sup></i> | <i>Ca<sup>2+</sup></i> | <i>Mg<sup>2+</sup></i> |
|----------------|-----------------------|-----------------------|-------------------------|----------------------|------------------------|------------------------|
| Hot, stagnant  | ND                    | 38.99                 | ND                      | ND                   | 1.00                   | ND                     |
| Hot, flushed   | ND                    | 42.42                 | ND                      | ND                   | ND                     | ND                     |
| Cold, stagnant | ND                    | 4.34                  | ND                      | ND                   | 22.21                  | 5.64                   |
| Cold, flushed  | ND                    | 4.91                  | ND                      | ND                   | 24.21                  | 6.51                   |

**Table S5:** Maximum metal concentrations measured during flushing, often associated with collected slugs of discolored water.

| Metal            | Concentration (ppb) | Relevant Limit (ppb) |                         | Location                      |
|------------------|---------------------|----------------------|-------------------------|-------------------------------|
| <b>Aluminum</b>  | 341.9               | 50-200               | (SMCL)                  | 1 <sup>st</sup> floor BR hot  |
| <b>Arsenic</b>   | 9.5                 | NA- hot water        |                         | 1 <sup>st</sup> floor BR hot  |
| <b>Cadmium</b>   | 18.1                | NA- hot water        |                         | 1 <sup>st</sup> floor BR hot  |
| <b>Copper</b>    | 7,842               | NA- hot water        |                         | 3 <sup>rd</sup> floor BR hot  |
| <b>Iron</b>      | 22,945              | 300                  | (SMCL)                  | 3 <sup>rd</sup> floor BR hot  |
| <b>Manganese</b> | 1,240               | 1,000                | (1-day health advisory) | 2 <sup>nd</sup> floor BR cold |
| <b>Nickel</b>    | 156.5               | 100                  | (MCL)                   | Kitchen cold (basement)       |
| <b>Lead</b>      | 150.5               | 1                    | (AAP Child level)       | Dish sprayer (basement)       |
| <b>Zinc</b>      | 2,166               | 5,000                | (SMCL)                  | Dish sprayer (basement)       |

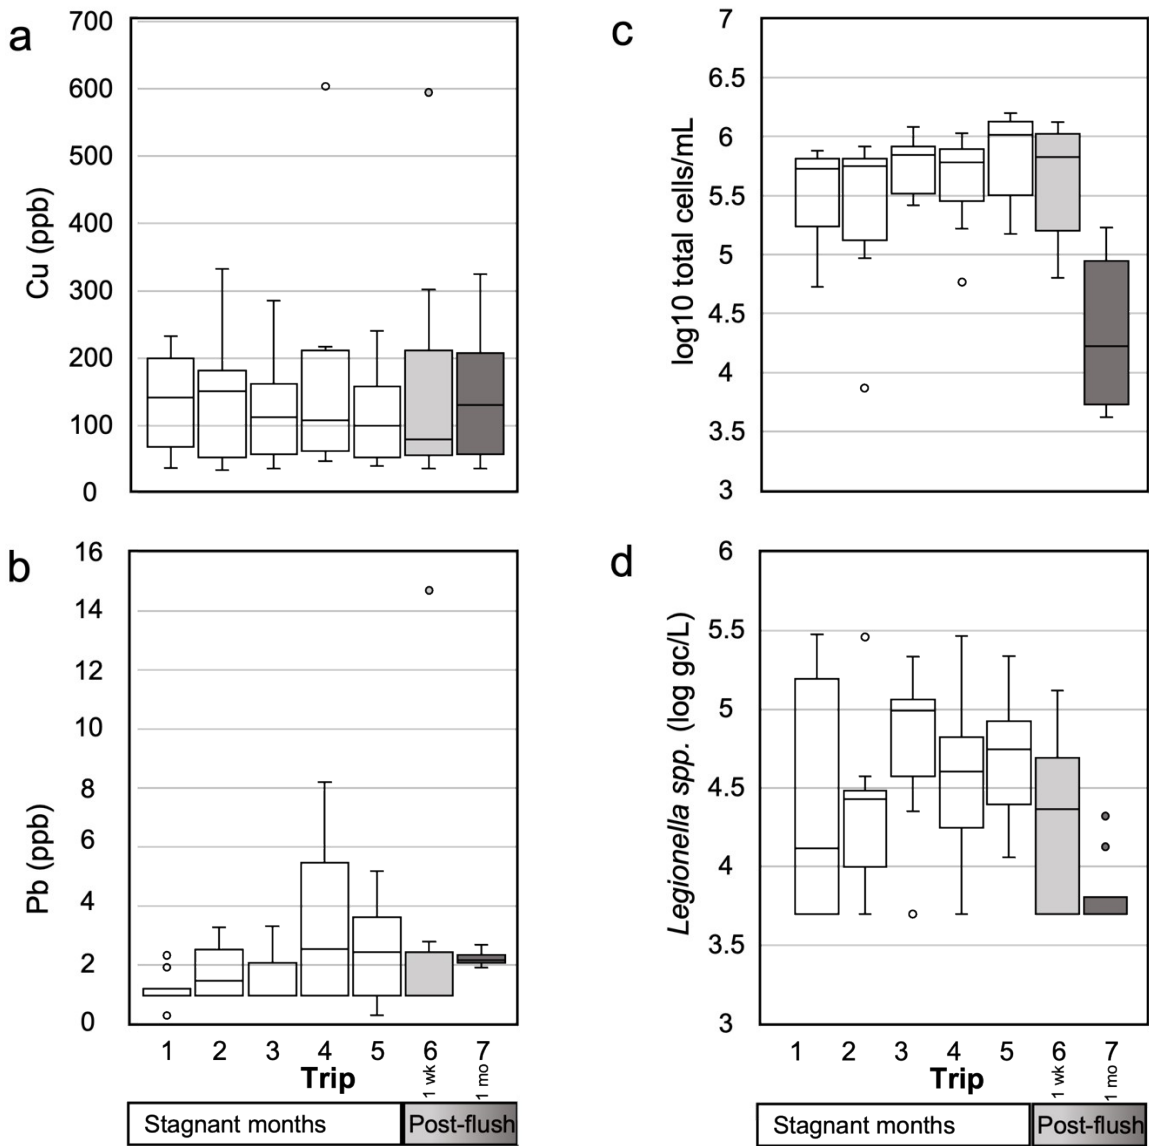

**Figure S1.** First draw (a) copper concentrations, (b) lead concentrations, (c) Total Cell Counts, and (d) *Legionella* spp. at 10 locations. For each box plot, n=10. Boxes represent Q1/median/Q3 values, with whiskers representing range and outliers as individual points. Each box represents a sampling trip (Trip 1 – April, Trip 2 – May, Trip 3 – June, Trip 4 – July, Trip 5 – August, Trip 6 – 1 week post-flush [light-grey], and Trip 7 - 4 weeks-post flush [dark-grey], in order). For lead, concentrations below the Limit of Detection (LOD=0.57 ppb) are shown as half the LOD. Concentrations below the Limit of Quantification (LOQ=1.91 ppb) are shown as half the LOQ. \*A nearby toilet was flushed before sampling. For *Legionella* spp., concentrations below the Limit of Detection (LOD=4 log<sub>10</sub> gc/L = 10 gc/mL) are shown as half the LOD (5 gc/mL = 3.7 log<sub>10</sub> gc/mL).

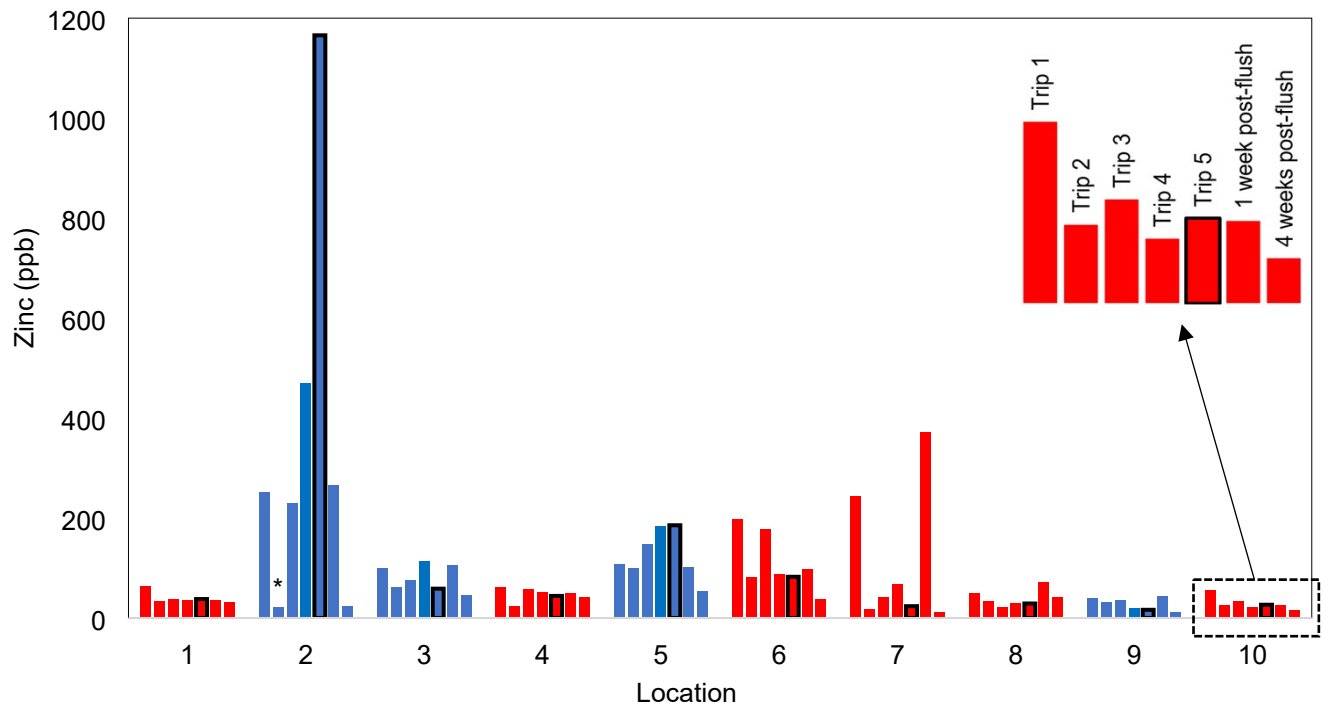

**Figure S2.** Zinc concentrations from first draw samples at 10 locations that drew either hot (red) or cold (blue) water. Each bar represents a sampling trip, and the location numbers are as defined in Figure 1. Bars outlined in black are the final sampling event prior to flushing. \*On this trip, a toilet near Location 2 was flushed immediately before sampling, potentially interfering with this result.



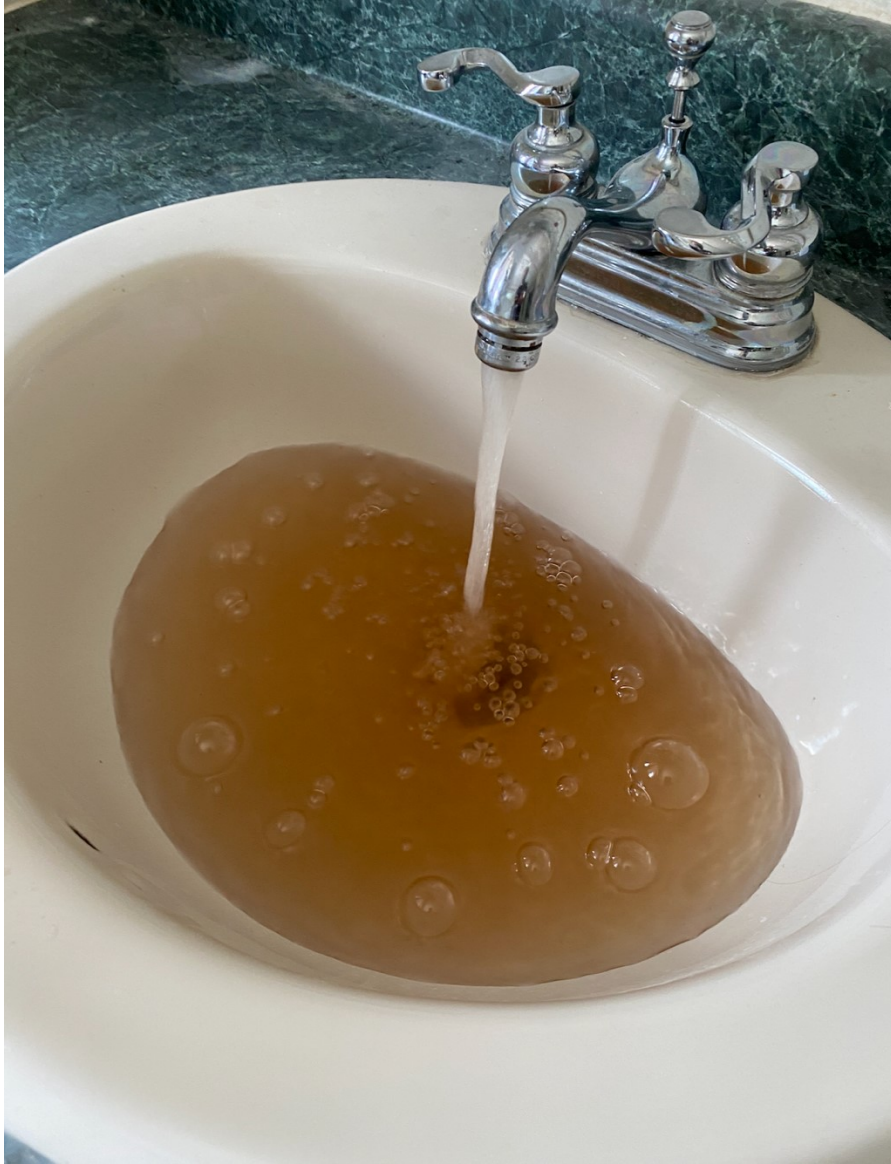

**Figure S3:** Example of discolored water encountered during flushing on upper floors.
